# Supplementary material
Source: publisher site journal article supplement (https://www.dovepress.com/article/433033)
Supplement: Supplementary file 1 [file get_supplementary_file.php]

Supplementary file 1

*Searching strategy*

| **Database** | **Keywords** | **Hits** |
| --- | --- | --- |
| **PubMed** | (Autologous Platelet-Rich Gel) AND (Diabetic Foot Ulcer) AND (Geriatric OR Elderly) Filters: Full text, Randomized Controlled Trial, in the last 10 years | 33 |
| **Cochrane** | Autologous Platelet Rich-Gel in Title Abstract Keyword AND Diabetic Foot Ulcer in Title Abstract Keyword AND Geriatric in Title Abstract Keyword OR Elderly in Title Abstract Keyword in All Text - with Publication Year from 2013 to 2023, with Cochrane Library publication date Between Jan 2013 and Jan 2023, in Trials (Word variations have been searched) | 360 |
| **Wiley** | Autologous Platelet Rich-Gel " anywhere and " Diabetic Foot Ulcer " anywhere and " Elderly " anywhere Publication 2013-2023, Type Publication: Journal | 33 |
| **Google Scholar** | Autologous Platelet Rich-Gel " Diabetic Foot Ulcer " " Elderly" | 552 |
| **Plos One** | (((everything: Autologous Platelet Rich-Gel) OR everything: Diabetic Foot Ulcer) AND everything:" Elderly ") | 187 |
